# Supplementary material for: Synergistic Bimetallic Catalysis for Closed-Loop Polyurethane Foam Upcycling via Proximity-Driven Depolymerization
Source: Research Square preprint supplement (doi:10.21203/rs.3.rs-6709291/v1), 2025-06-25
Supplement: Supplementary file 1 [file 02e0334192c5ae1ecb83d0e7.docx]

Supplementary Information for

**Synergistic Bimetallic Catalysis for Closed-Loop Polyurethane Foam Upcycling via Proximity-Driven Depolymerization**

Kaiming Du, Huiwen He*, Zongsheng Liu, Fan Yang, Ming Lu, Hang Hu, Lingxiao Cui, Meng Ma, Yanqin Shi, Yulu Zhu, Si Chen and Xu Wang*

College of Materials Science and Engineering, Zhejiang Key Laboratory of Plastic Modification and Processing Technology, Zhejiang University of Technology, Hangzhou 310014, PR China.

*Corresponding authors.

E-mail addresses: [hehuiwen@zjut.edu.cn](mailto:hehuiwen@zjut.edu.cn); [wangxu@zjut.edu.cn](mailto:wangxu@zjut.edu.cn).


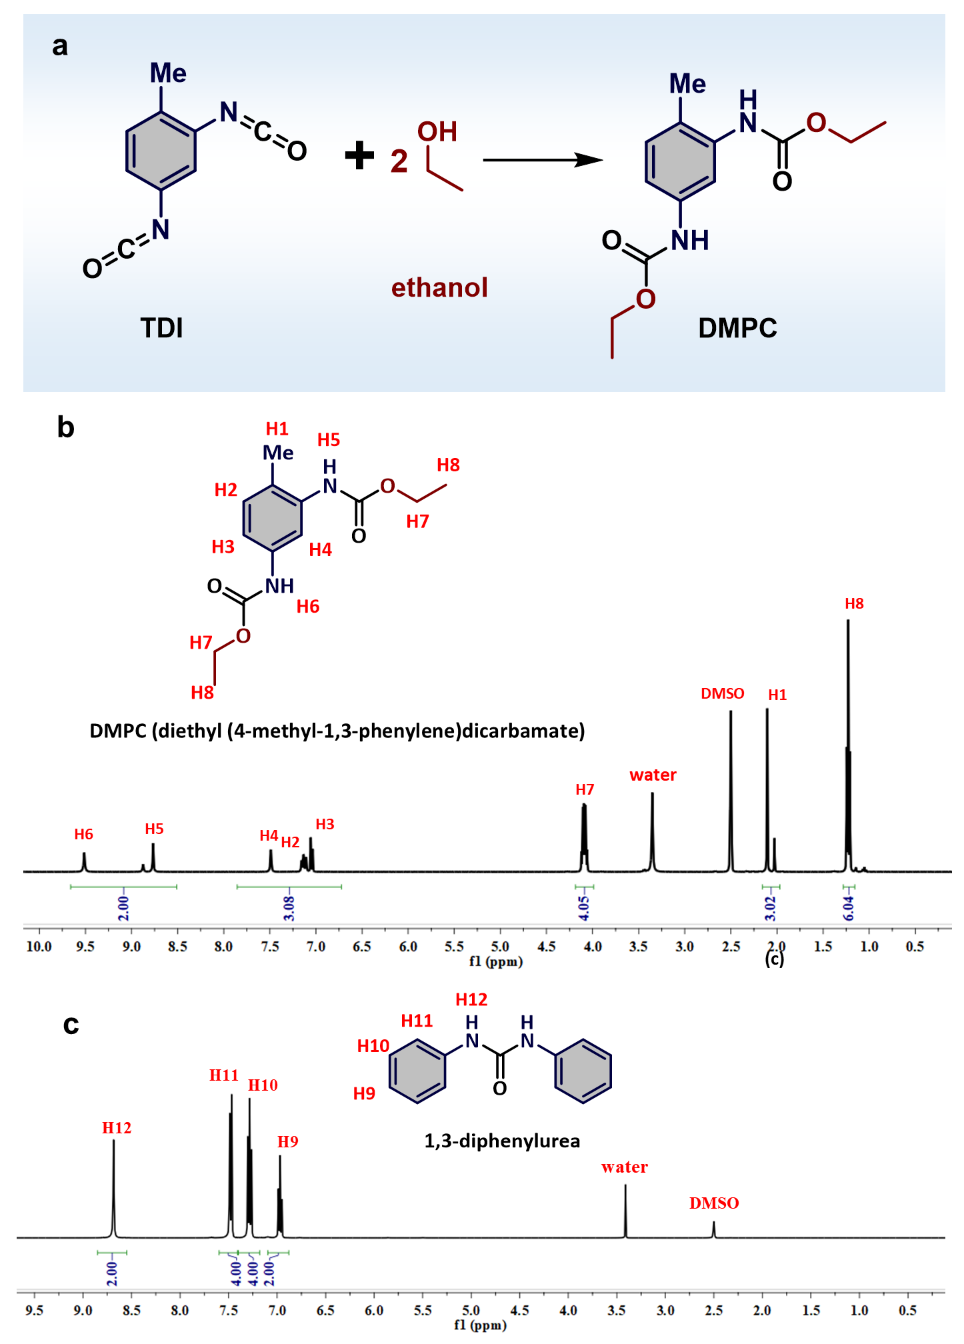


**Fig. S1.** (a) reaction equation of DMPC synthesis, (b) 1H NMR (in DMSO-*d6*) spectra of DMPC, (c) 1H NMR (in DMSO-*d6*) spectra of DPU.


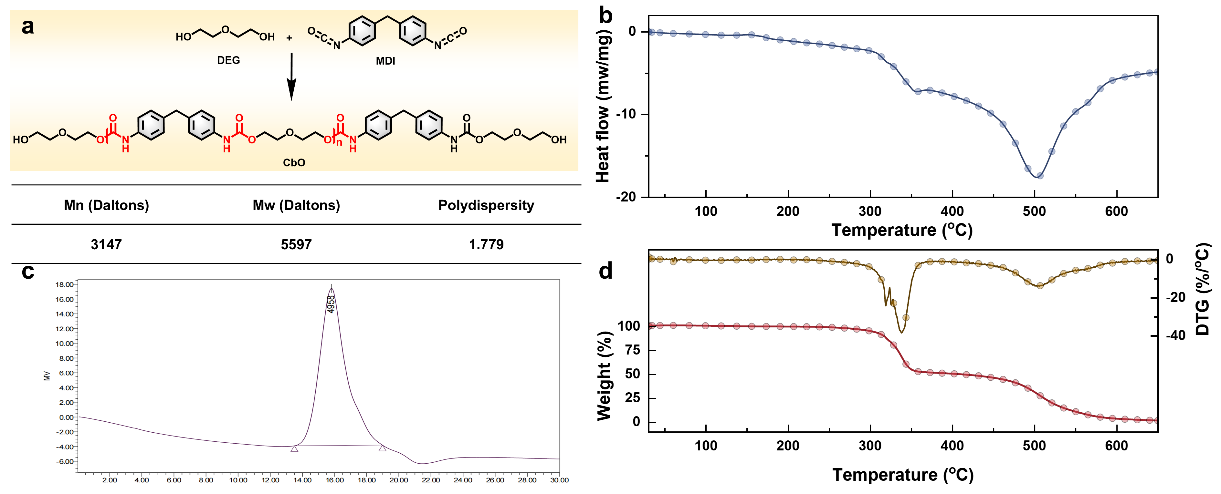


**Fig. S2.** (a) reaction equation of CbO synthesis, (b) DSC diagrams of CbO, (c) GPC diagrams of CbO, (d) TGA and DTG diagrams of CbO.

**
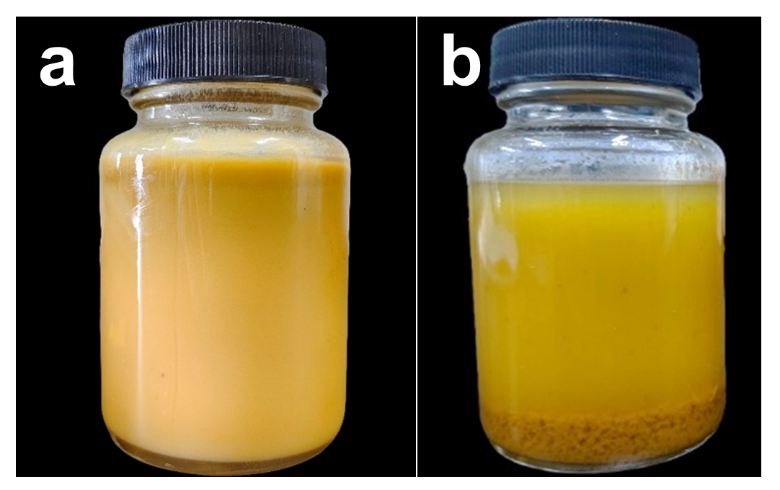
**

**Fig. S3.** Digital photos of (a) RP- no catalyst, (b) RP- TMG/Cd/HMMI.


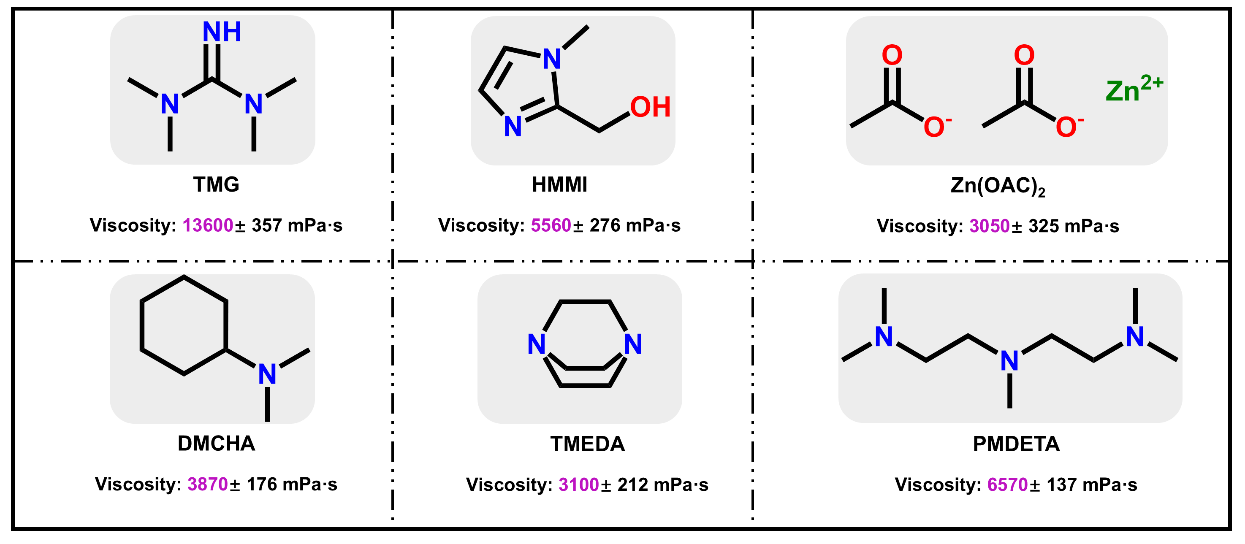


**Fig. S4.** Viscosity of PUF degradation products at DEA system and different catalysts.


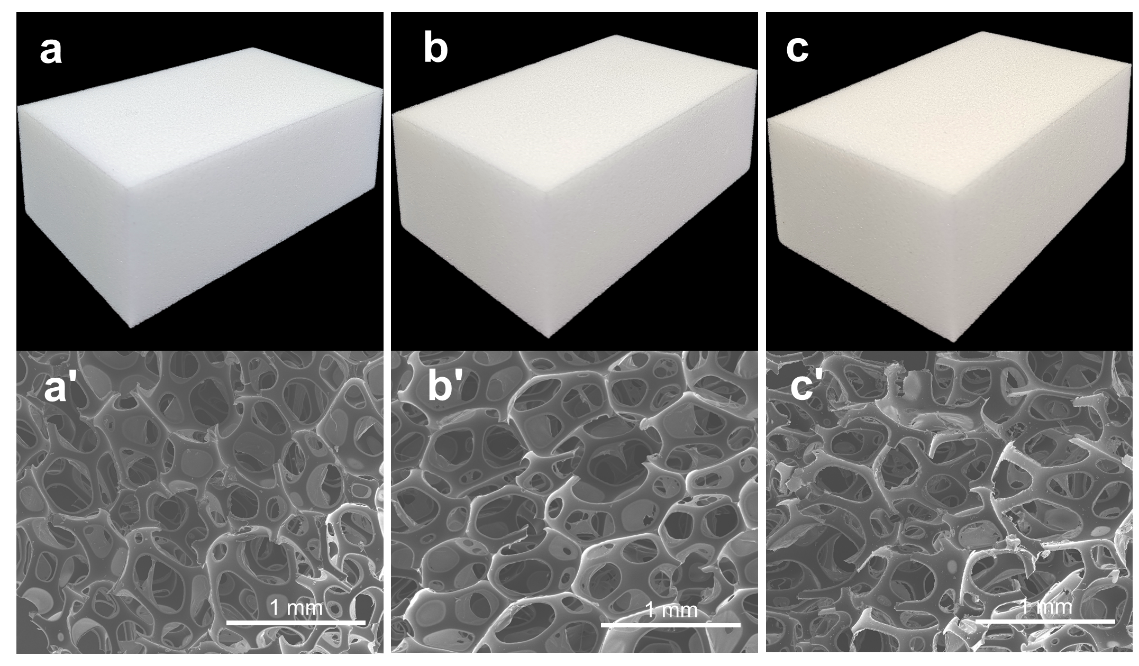


**Fig. S5.**Digital photos of (a) RPUFs-0RP, (b) RPUFs-30RP, (c) RPUFs-40RP, and (d) RPUFs-40RP. SEM images of (a’) RPUFs-0RP, (b’) RPUFs-20RP, (c’) RPUFs-30RP, and (d’) RPUFs-40RP.


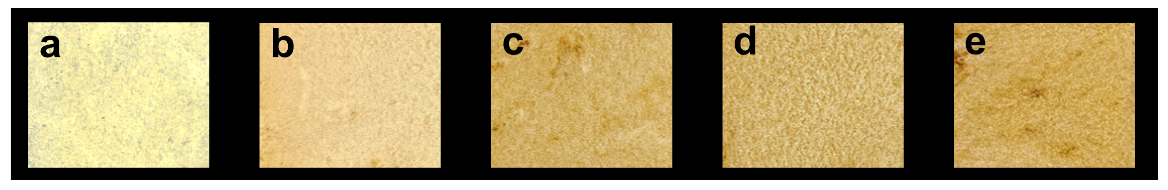


**Fig. S6.** Digital photos of (a) Rigid- RPUF- 0HS, (b) Rigid- RPUF- 10HS, (c) Rigid- RPUF-20HS, (d) Rigid- RPUF- 30HS, (e) Rigid- RPUF- 40HS.


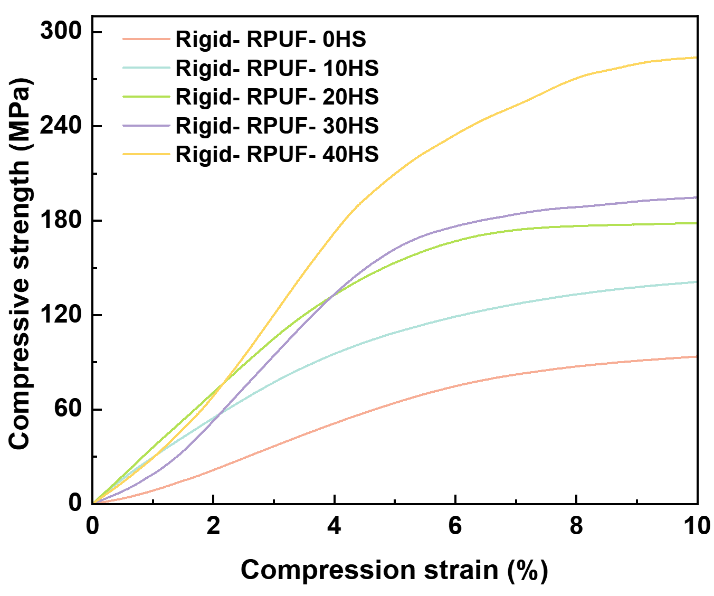


**Fig. S7.** 10% Compressive strength of rigid RPUF with different hard segment (HS) content.


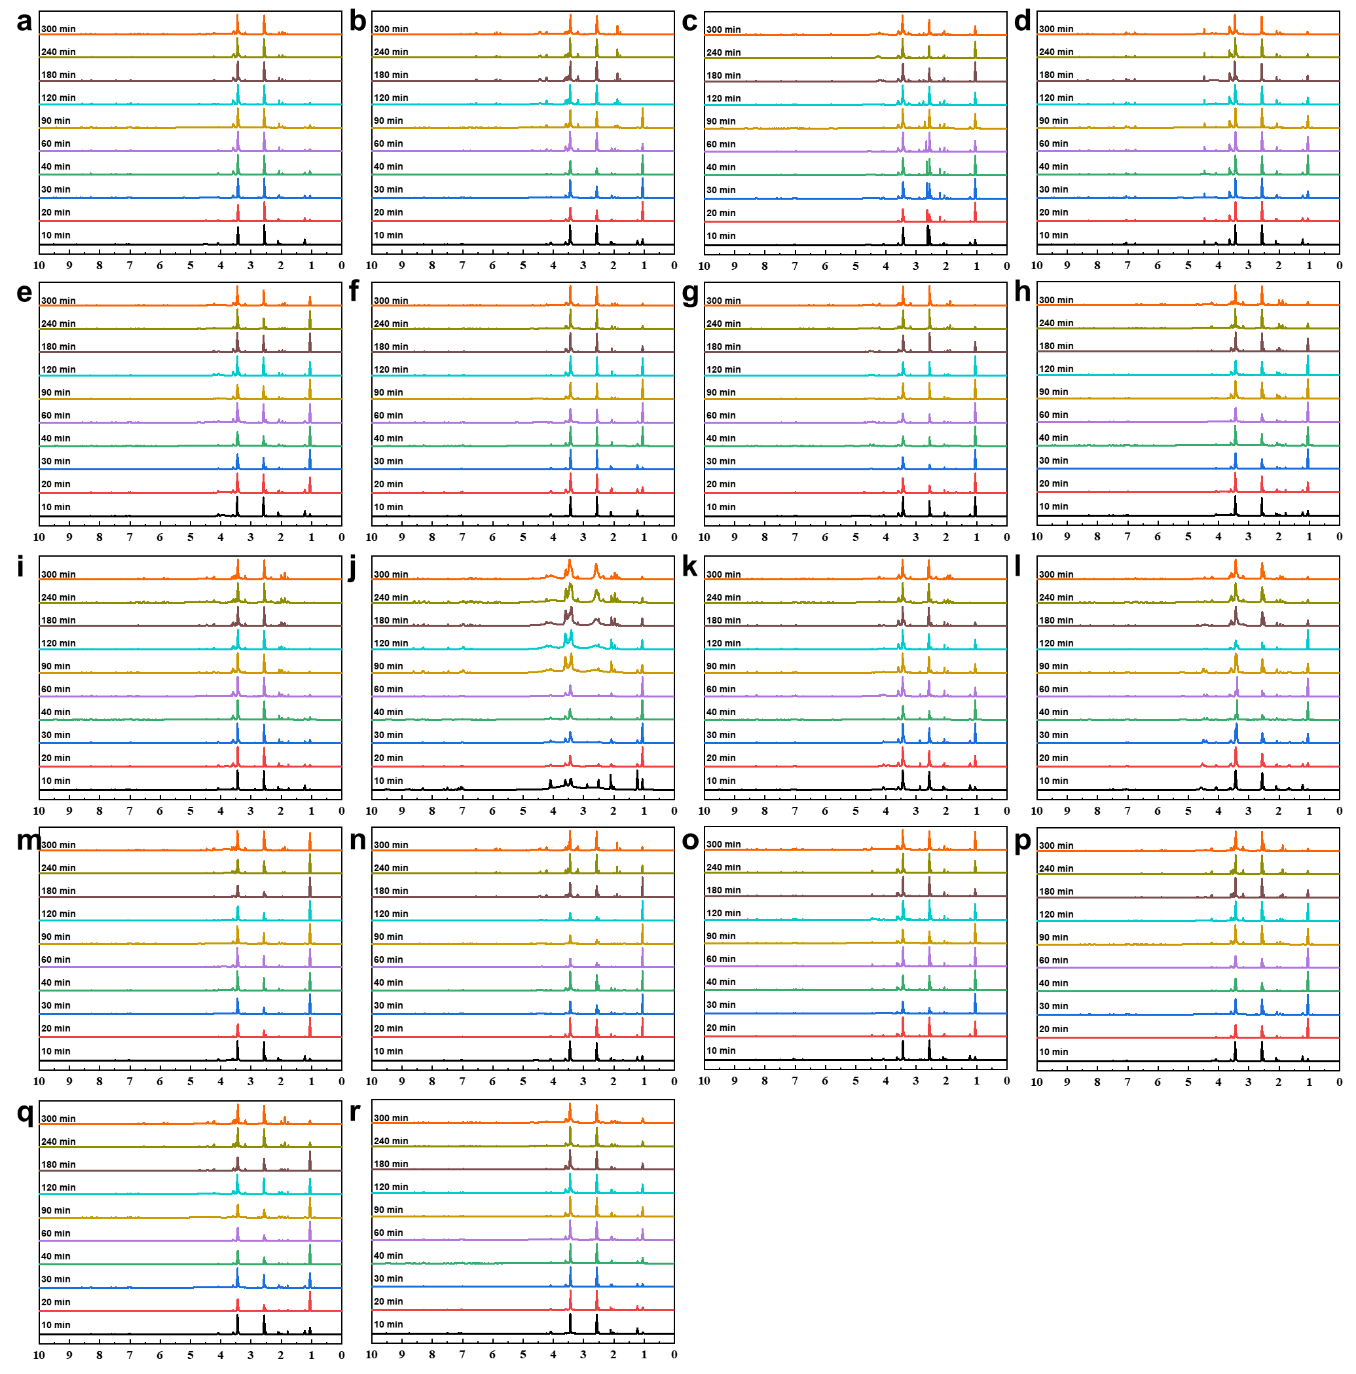


**Fig. S8** 1H NMR (in DMSO-*d6*) spectrum of DMPC after reaction at different times and catalysts. (a) no catalyst, (b) TMG/Cd/HMMI, (c) TMG, (d) HMMI, (e) Cd(NO3)2, (f) NaI, (g) NaOH, (h) Zn(OAC)2, (i) TMG/Zn/HMMI, (j) TMG/Cu/HMMI, (k) TMG/Ni/HMMI, (l) TMG/Co/HMMI, (m) Cd/HMMI, (n) TMG/Cd, (o) TMG/HMMI, (p) Cd(OH)2, (q) Cd(OAC)2, (r) hard segments (HS).


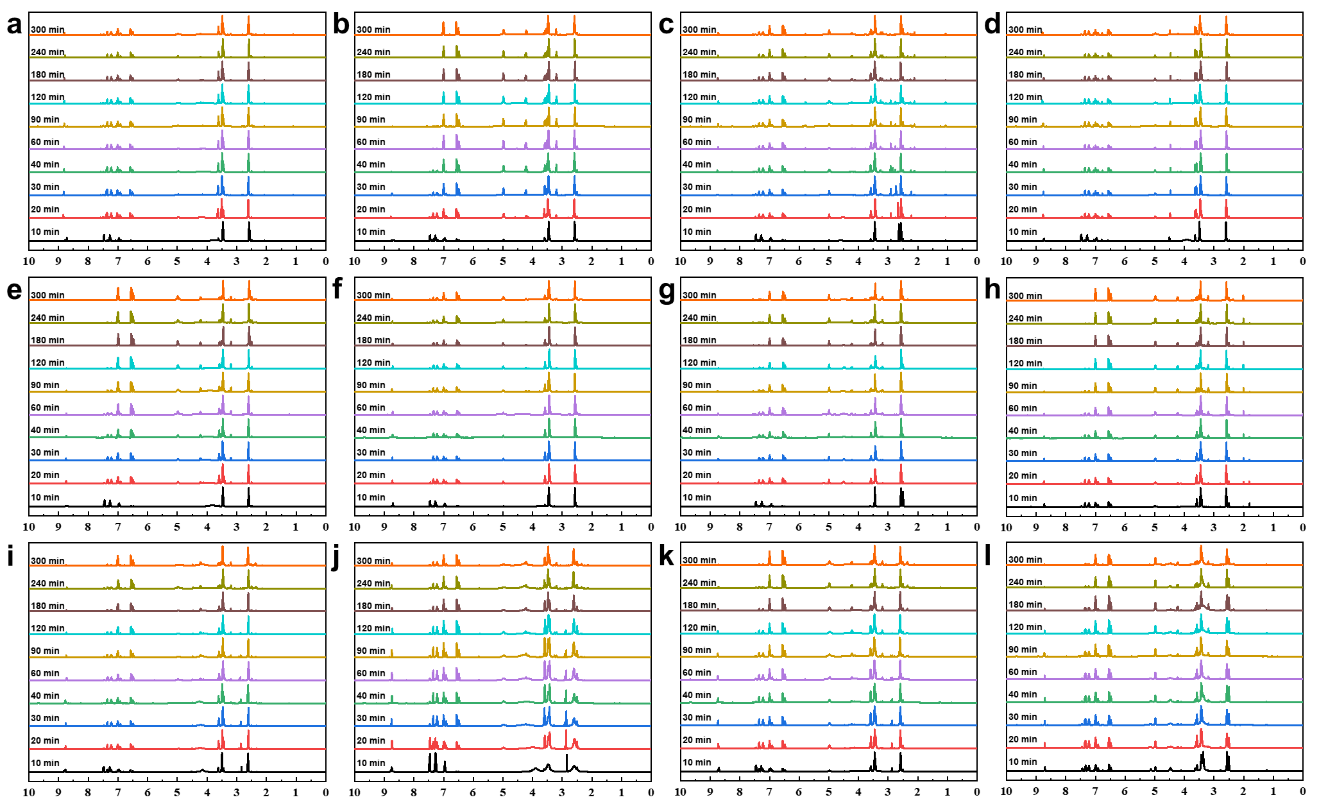


**Fig. S9** 1H NMR (in DMSO-*d6*) spectrum of DPU after reaction at different times and catalysts. (a) no catalyst, (b) TMG/Cd/HMMI, (c) TMG, (d) HMMI, (e) Cd(NO3)2, (f) NaI, (g) NaOH, (h) Zn(OAC)2, (i) TMG/Zn/HMMI, (j) TMG/Cu/HMMI, (k) TMG/Ni/HMMI, (l) TMG/Co/HMMI.

**Table S1.** Reference binding energy of Cd(NO3)2 at Cd 3d5/2 and Cd MNN1.

| Sample | Cd 3d5/2 (eV) | Cd MNN (eV) |
| --- | --- | --- |
| Cd(NO3)2 | 406.4 | 374.3 |

| Sample | Nitrogen % | Carbon % | Oxygen % | Cadmium % | Hydrogen % |
| --- | --- | --- | --- | --- | --- |
| TMG/Cd/HMMI | 14.72 | 22.83 | 22.83 | 36.19 | 3.44 |

**Table S2.** Content proportion of each element in TMG/Cd/HMMI.

**Table S3.** Initial loss temperature (T5%), maximum loss temperature (Tmax), final residual mass and Cd element content of TMG/Cd/HMMI, TMG, HMMI.

| Samples | T5% (oC) | Tmax (oC) | Residual weight at 800 oC (wt%) | Cd element content (%) |
| --- | --- | --- | --- | --- |
| TMG/Cd/HMMI | 268 | 338 | 42.57 | 37.27 |
| TMG | 56 | 135 | 1.38 | / |
| HMMI | 177 | 247 | 0 | / |

**Table S4.** EXAFS fitting parameters at the Cd K-edge for reference materials and TMG/Cd/HMMI.

| Sample | scattering pair | CN | R(Å) | σ2 (10-3Å2) | ΔE0(eV) | s02 | range | R factor |
| --- | --- | --- | --- | --- | --- | --- | --- | --- |
| Cd foil | Cd-Cd1 | 6* | 2.94±0.002 | 0.012±0.0002 | -4.5±0.2 | 0.82±0.02 | 3-12 | 0.0020 |
| CdO | Cd-O | 6* | 2.32±0.004 | 0.003±0.0006 | 3.9±0.2 | 0.76±0.01 | 3-15 | 0.0032 |
| Cd-Cd | 12* | 3.31±0.001 | 0.002±0.0001 |
| CdS | Cd-S | 4* | 2.53±0.001 | 0.002±0.0001 | 4.0±0.2 | 0.81±0.01 | 3-15 | 0.0015 |
| TMG/Cd/HMMI | Cd-O/N | 4.3±0.1 | 2.27±0.002 | 0.011±0.0004 | -1.4±0.2 | 0.82 | 3-13 | 0.0058 |
| Cd-Cd | 1.2±0.2 | 2.39±0.013 | 0.024±0.0012 |

CN, coordination number; R, the distance to the neighboring atom; σ2, the Mean Square Relative Displacement (MSRD); ΔE0, inner potential correction; R factor indicates the goodness of the fit. s02 of the sample was fixed according to the experimental EXAFS fit of metal foil by fixing CN as the known crystallographic value (labeled using the symbol of *) A reasonable range of EXAFS fitting parameters: 0.700 < Ѕ02 < 1.050; CN > 0; σ2 > 0.002 Å2; |ΔE0| < 15 eV; R factor < 0.02.

**Table S5.** Cd content of TMG/Cd, Cd/HMMI, TMG/HMMI.

| Sample | Cd content in sample% |
| --- | --- |
| TMG/Cd | 80.38 |
| Cd/HMMI | 27.12 |
| TMG/Cd/HMMI | 36.33 |

**Table S6.** Solubility of TMG/Cd, TMG/Cd/HMMI in DEA at different times

| Sample | Dissolution rate (%) 10 min | Dissolution rate (%) 30 min |
| --- | --- | --- |
| TMG/Cd/HMMI | 100 | 100 |
| TMG/Cd | 9.26 | 34.72 |

**Table S7.** Cd content in different phases of RP.

| Sample | Cadmium % |
| --- | --- |
| RP-L | 0.0008 (8ppm) |
| RP-S | 2.63 |

**Table S8.** Properties of original polyol (VP) and recycled polyol (RP- no catalyst, RP- TMG/Cd/HMMI).

|  | VP | RP- no catalyst | RP- TMG/Cd/HMMI |
| --- | --- | --- | --- |
| HV (mgKOH g-1) | 56 | 57 | 66 |
| AV (mgKOH g-1) | 0 | 0.72 | 0.37 |
| Viscosity (mPa s) | 0.5k | 2.9k | 0.9k |
| *M*w (*D*a) | 4.3k | 5.3k | 4.6k |
| PDI | 1.50 | 1.67 | 1.61 |

**Table S9.** Viscosity of PPG with varying hard segment contents after ball milling.

| Sample | Viscosity (mPa·s) |
| --- | --- |
| PPG | 500 ± 50 |
| 10%HS/PPG | 710 ± 50 |
| 20%HS/PPG | 1070 ± 50 |
| 30%HS/PPG | 1660 ± 70 |
| 40%HS/PPG | 3350 ± 100 |

**Table S10.** Mechanical properties of Flexible - RPUF with different amount of recycled polyol.

| Sample | Density (kg·m-3) | Rebound rate (%) | 40% indentation force deflection (N) | 75% permanent compression rate (%) |
| --- | --- | --- | --- | --- |
| commerical PUF | 26.6-30.8 | ≥37.0 | 123-177 | ≤7.0 |
| RPUF-0RP | 27.7 ± 1.1 | 40.7 ± 1.5 | 129 ± 2.1 | 1.1 ± 0.1 |
| RPUF-30RP | 28.9 ± 1.5 | 43.8 ± 1.2 | 143 ± 1.7 | 2.3± 0.3 |
| RPUF-40RP | 27.3 ± 0.9 | 42.6 ± 1.1 | 157 ± 2.3 | 3.7± 0.1 |

**Table S11.** Mechanical properties of Rigid- RPUF with different hard segment (HS) content.

| Sample | Density (kg·m-3) | Shore C Hardness (HC) | 10% Compressive strength (KPa) |
| --- | --- | --- | --- |
| Rigid- RPUF- 0HS | 57.1 ± 1.2 | 44.6 ± 0.8 | 93.7± 6.1 |
| Rigid- RPUF- 10HS | 63.6 ± 1.8 | 52.0 ± 1.4 | 141.1± 6.9 |
| Rigid- RPUF- 20HS | 68.3 ± 2.1 | 55.1 ± 1.1 | 178.5± 7.2 |
| Rigid- RPUF- 30HS | 71.0 ± 2.3 | 57.6 ± 0.7 | 194.8± 9.2 |
| Rigid- RPUF- 40HS | 72.6 ± 3.1 | 60.0 ± 1.6 | 283.8± 7.8 |

**Table S12.** Calculation of environmental energy impact factors of different catalysts with DMPC as matrix.

| **Catalyst** | **Temp.**  **(oC)** | **Reaction Time (min)** | **Solvent/DMPC**  **(w/w)** | **Cat/DMPC**  **(w/w)** | **Yield**  **(%)** | **Energy economy**  **(ε)** **(oC−1·min−1)** | **Efactor**  **(a.u)** | **Environmental energy impact**  **(ξ)** **(oC·min)** |
| --- | --- | --- | --- | --- | --- | --- | --- | --- |
| TMG/Cd/MMI | 160 | 60 | 2 | 0.25 | 84.9 | 2.95*10-3 | 3.05 | 1.04*103 |
| TMG/Cu/MMI | 160 | 60 | 2 | 0.22 | 50.8 | 1.76*10-3 | 10.00 | 5.67*103 |
| TMG/Zn/MMI | 160 | 60 | 2 | 0.22 | 57.9 | 2.01*10-3 | 7.93 | 3.95*103 |
| TMG/Ni/MMI | 160 | 60 | 2 | 0.21 | 54.3 | 1.89*10-3 | 8.90 | 4.72*103 |
| TMG | 160 | 60 | 2 | 0.26 | 48.8 | 1.70*10-3 | 11.64 | 6.86*103 |
| MMI | 160 | 60 | 2 | 0.25 | 52.0 | 1.81*10-3 | 10.59 | 5.86*103 |
| Cd(NO3)2 | 160 | 60 | 2 | 0.23 | 55.4 | 1.92*10-3 | 8.24 | 4.28*103 |
| NaI | 160 | 60 | 2 | 0.11 | 51.7 | 1.79*10-3 | 7.49 | 4.17*103 |
| NaOH | 160 | 60 | 2 | 0.03 | 66.4 | 2.31*10-3 | 3.27 | 1.42*103 |

**Table S13.** Calculation of environmental energy impact factors of different catalysts with DPU as matrix.

| **Catalyst** | **Temp.**  **(oC)** | **Reaction Time (min)** | **Solvent/DPU**  **(w/w)** | **Cat/DPU (w/w)** | **Yield (%)** | **Energy**  **economy (ε)**  **(oC−1·min−1)** | **Efactor**  **(a.u)** | **Environmental**  **energy impact**  **(ξ) (oC·min)** |
| --- | --- | --- | --- | --- | --- | --- | --- | --- |
| TMG/Cd/MMI | 160 | 60 | 1.2 | 0.16 | 93.3 | 9.72*10-3 | 0.34 | 35.06 |
| TMG/Cu/MMI | 160 | 60 | 1.2 | 0.14 | 48.8 | 5.08*10-3 | 0.60 | 117.60 |
| TMG/Zn/MMI | 160 | 60 | 1.2 | 0.14 | 59.2 | 6.17*10-3 | 0.49 | 80.22 |
| TMG/Ni/MMI | 160 | 60 | 1.2 | 0.13 | 62.8 | 6.54*10-3 | 0.46 | 70.46 |
| TMG | 160 | 60 | 1.2 | 0.16 | 54.3 | 5.66*10-3 | 0.59 | 104.63 |
| MMI | 160 | 60 | 1.2 | 0.16 | 45.0 | 4.69*10-3 | 0.71 | 150.73 |
| Cd(NO3)2 | 160 | 60 | 1.2 | 0.15 | 80.7 | 8.41*10-3 | 0.37 | 44.52 |
| NaI | 160 | 60 | 1.2 | 0.07 | 45.0 | 4.69*10-3 | 0.48 | 103.19 |
| NaOH | 160 | 60 | 1.2 | 0.02 | 67.7 | 7.05*10-3 | 0.23 | 33.18 |

**References**

1. Tkachenko, O. P., Shpiro, E. S., Wark, M., Schulz-Ekloff, G. & Jaeger, N. I. X-ray photoelectron/X-ray excited auger electron spectroscopic study of highly dispersed semiconductor CdS and CdO species in zeolites. *Journal of the Chemical Society, Faraday Transactions* **89**, 3987-3994 (1993).
